# Supplementary material for: Achieving excellent energy storage performance with thermal stability in lead-free AgNbO3 ceramics
Source: Royal Society of Chemistry journal article supplement (doi:10.1039/d3dt03139j), 2024-01-01
Supplement: d3dt03139j1.pdf [file d3dt03139j1.pdf]

## Achieving excellent energy storage performance with thermal stability in lead-free $\text{AgNbO}_3$ ceramics

Wenna Chao <sup>a,b</sup>, Juan Du <sup>a</sup>, Peng Li <sup>a</sup>, Wei Li <sup>a</sup>, Tongqing Yang <sup>b,\*</sup>

<sup>a</sup> College of Materials Science and Engineering, Liaocheng University, Liaocheng 252059, China.

<sup>b</sup> Key Laboratory of Advanced Civil Engineering Materials of the Ministry of Education, Functional Materials Research Laboratory, School of Materials Science and Engineering, Tongji University, 4800 Cao'an Road, Shanghai 201804, China.

Email: yangtongqing@tongji.edu.cn

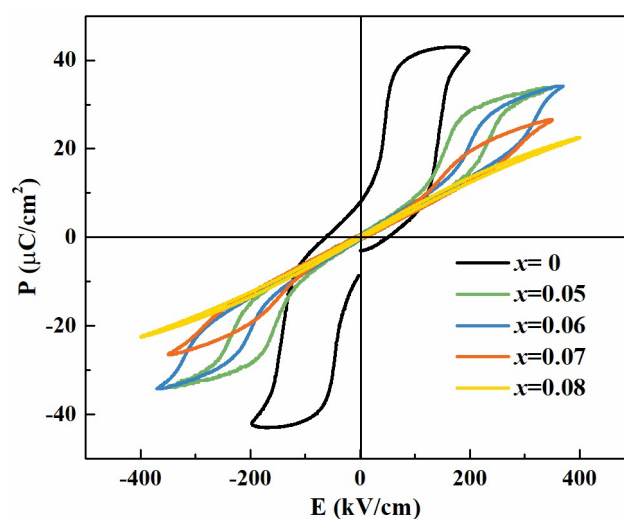

Fig. S1 The full hysteresis loops of the SAN<sub>x</sub> ceramics

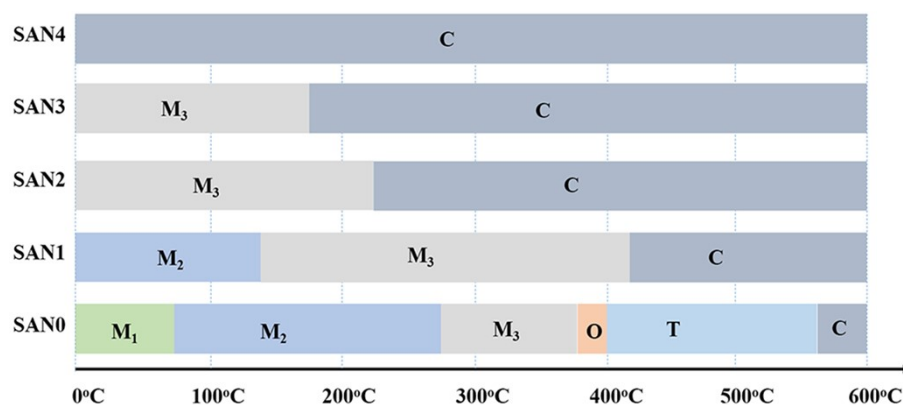

Fig. S2 Phase diagram of SAN<sub>x</sub> ceramics.

Table S1 The average ionic radii of A and B-sites cations and tolerance factor of SAN<sub>x</sub> ceramics.

| Composition ( <i>x</i> ) | R <sub>A-site</sub> (Å) | R <sub>B-site</sub> (Å) | Tolerance factor |
|--------------------------|-------------------------|-------------------------|------------------|
| 0                        | 1.280                   | 0.64                    | 0.927            |
| 0.05                     | 1.142                   | 0.64                    | 0.880            |
| 0.06                     | 1.114                   | 0.64                    | 0.870            |
| 0.07                     | 1.087                   | 0.64                    | 0.860            |
| 0.08                     | 1.059                   | 0.64                    | 0.851            |

Table S2 The crystal and refined parameters of SAN<sub>x</sub> ceramics.

| Compositions ( <i>x</i> ) | 0                                                 | 0.05                                              | 0.06                                              | 0.07                                              | 0.08                                              |
|---------------------------|---------------------------------------------------|---------------------------------------------------|---------------------------------------------------|---------------------------------------------------|---------------------------------------------------|
| Space group               | Pbcm                                              | Pbcm                                              | Pbcm                                              | Pbcm                                              | Pbcm                                              |
| Unit cell dimensions      | a=5.5465Å<br>b=5.6025 Å<br>c=15.6370 Å            | a=5.5427Å<br>b=5.5819 Å<br>c=15.6675 Å            | a=5.5345Å<br>b=5.5789 Å<br>c=15.6743 Å            | a=5.5324Å<br>b=5.5693 Å<br>c=15.6813 Å            | a=5.5258Å<br>b=5.56 Å<br>c=15.6882 Å              |
| Volume                    | 485.90Å <sup>3</sup>                              | 484.7Å <sup>3</sup>                               | 484Å <sup>3</sup>                                 | 483.2Å <sup>3</sup>                               | 482Å <sup>3</sup>                                 |
| Refining parameters       | R <sub>wp</sub> =0.0650<br>R <sub>p</sub> =0.0450 | R <sub>wp</sub> =0.0731<br>R <sub>p</sub> =0.0537 | R <sub>wp</sub> =0.0633<br>R <sub>p</sub> =0.0462 | R <sub>wp</sub> =0.0650<br>R <sub>p</sub> =0.0478 | R <sub>wp</sub> =0.0686<br>R <sub>p</sub> =0.0492 |

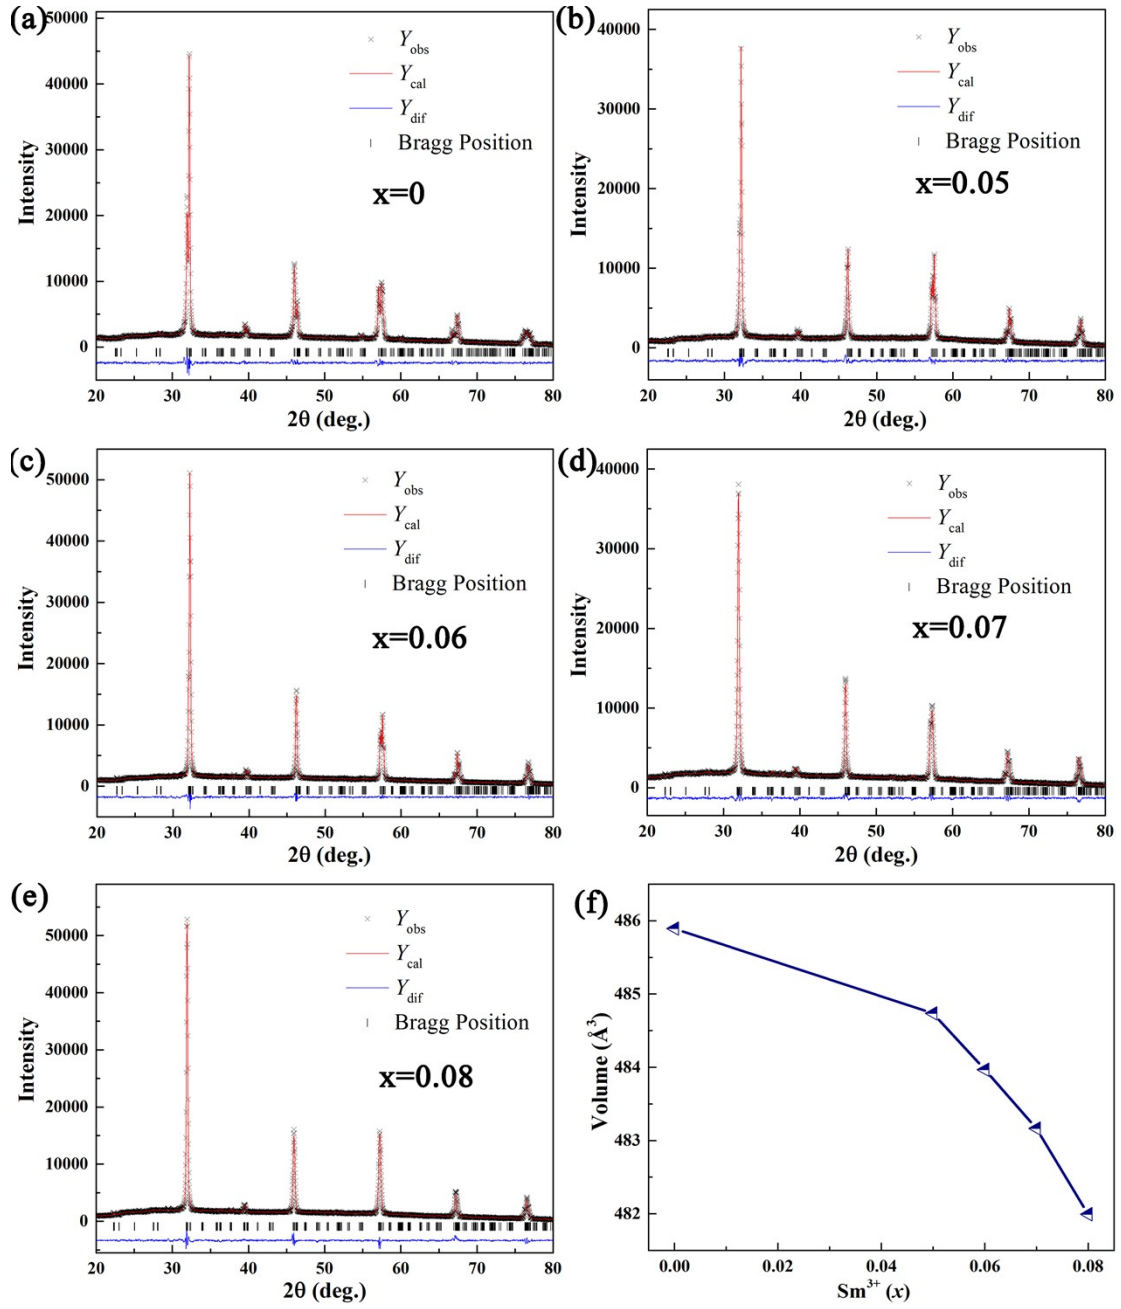

Fig. S3 (a)-(e) The Rietveld refinement based on space group of Pbcm of SAN<sub>x</sub> ceramics, showing observed (cross), calculated (line) and difference (lower) profiles; (f) The cell volume as a function of Sm<sup>3+</sup> content.

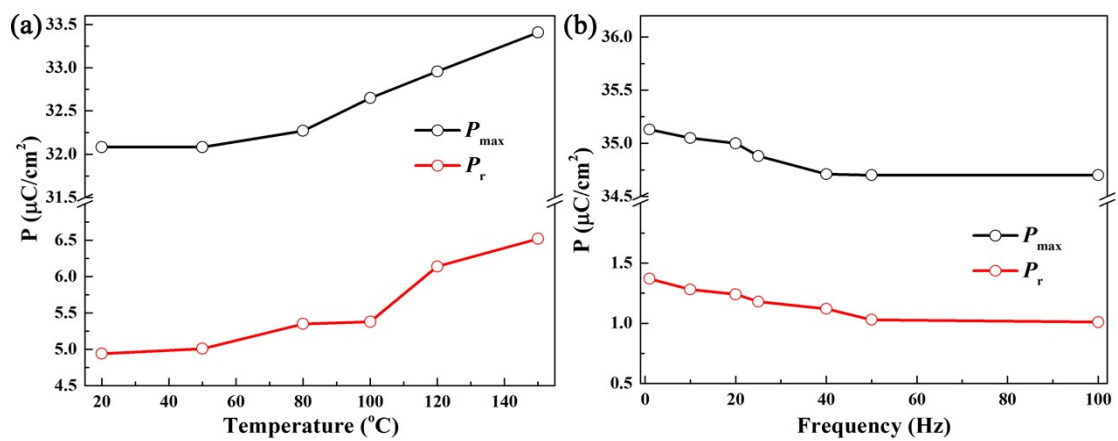

Fig. S4  $P_{\max}$  and  $P_r$  at different (a) temperatures and (b) frequencies.
